# Supplementary material for: Evaluation of robotic versus open partial pancreatoduodenectomy—study protocol for a randomised controlled pilot trial (EUROPA, DRKS00020407)
Source: PubMed Central journal article supplement (PMC7796523; doi:10.1186/s13063-020-04933-8), 2021-01-08
Supplement: 13063_2020_4933_MOESM2_ESM.pdf [file 13063_2020_4933_MOESM2_ESM.pdf]

| <b>Visit 1 Screening</b>                                          |                                               |                                                                                                                                                                                                              |
|-------------------------------------------------------------------|-----------------------------------------------|--------------------------------------------------------------------------------------------------------------------------------------------------------------------------------------------------------------|
| <b>Variable</b>                                                   | <b>Type</b>                                   | <b>Value</b>                                                                                                                                                                                                 |
| Centre                                                            | (automatic REDCap data access group variable) | (name of data access group)                                                                                                                                                                                  |
| Screening no.<br>(must provide value)                             | integer                                       |                                                                                                                                                                                                              |
| Date of screening visit                                           | date                                          |                                                                                                                                                                                                              |
| <b>Demographic data</b>                                           |                                               |                                                                                                                                                                                                              |
| Age (years)                                                       | integer                                       | (xxx)                                                                                                                                                                                                        |
| Sex                                                               | radio                                         | male<br>female<br>diverse                                                                                                                                                                                    |
| Height (cm)                                                       | integer                                       | (xxx)                                                                                                                                                                                                        |
| Weight (kg)                                                       | integer                                       | (xxx)                                                                                                                                                                                                        |
| <b>Baseline clinical data</b>                                     |                                               |                                                                                                                                                                                                              |
| Smoking                                                           | radio                                         | Current smoker<br>Former smoker<br>Non-smoker                                                                                                                                                                |
| Alcohol consumption                                               | radio                                         | Yes, often (daily, almost daily)<br>Yes, occasionally (approximately once a week)<br>Yes, rarely (less than once a week)<br>No current alcohol consumption, but drank in the past<br>No, never drank alcohol |
| American Society of Anesthesiologists (ASA) classification        | radio                                         | ASA I<br>ASA II<br>ASA III<br>ASA IV                                                                                                                                                                         |
| Previous abdominal surgeries                                      | radio                                         | Yes<br>No                                                                                                                                                                                                    |
| if yes: Number of previous abdominal surgeries                    | integer                                       | (x)                                                                                                                                                                                                          |
| if yes: Number of previous minimally invasive abdominal surgeries | integer                                       | (x)                                                                                                                                                                                                          |
| Current (within 14 days before surgery) medication                | radio                                         | Yes<br>No                                                                                                                                                                                                    |
| if yes: Glucocorticoids                                           | radio                                         | Yes<br>No                                                                                                                                                                                                    |
| Immunosuppressives                                                | radio                                         | Yes<br>No                                                                                                                                                                                                    |
| Analgetics                                                        | radio                                         | Yes<br>No                                                                                                                                                                                                    |
| Octreotide, Somatostatin(-analogues)                              | radio                                         | Yes<br>No                                                                                                                                                                                                    |
| Anticoagulants                                                    | radio                                         | Yes<br>No                                                                                                                                                                                                    |
| <b>Pancreas specific medical history</b>                          |                                               |                                                                                                                                                                                                              |
| Indication for surgery                                            | radio                                         | Malignant<br>Benign                                                                                                                                                                                          |

|                                                                           |        |                                                                                                                                                                                                                                                                                                                                                   |
|---------------------------------------------------------------------------|--------|---------------------------------------------------------------------------------------------------------------------------------------------------------------------------------------------------------------------------------------------------------------------------------------------------------------------------------------------------|
| if malignant: (Suspected) type of cancer                                  | radio  | Pancreatic ductal adenocarcinoma<br>Neuroendocrine tumour (NET)<br>Distal cholangiocarcinoma<br>Ampullary cancer ("Papillenkarzinom")<br>Serous cystic neoplasia (SCN)<br>Mucinous cystic neoplasia (MCN)<br>Intraductal papillary-mucinous carcinoma (IPMN-carcinoma)<br>Acinar cell carcinoma<br>Solid-pseudopapillary neoplasia (SPN)<br>Other |
| if other: Please specify other type of cancer                             | text   |                                                                                                                                                                                                                                                                                                                                                   |
| if benign: Type of disease                                                | Radio  | Chronic pancreatitis<br>Autoimmune pancreatitis<br>Intraductal papillary mucinous neoplasm (IPMN)<br>Other                                                                                                                                                                                                                                        |
| if other: Please specify other disease                                    | text   |                                                                                                                                                                                                                                                                                                                                                   |
| Preexisting diabetes mellitus                                             | radio  | Yes<br>No                                                                                                                                                                                                                                                                                                                                         |
| Preexisting exocrine insufficiency with pancreatic enzyme supplementation | radio  | Yes<br>No                                                                                                                                                                                                                                                                                                                                         |
| if indication=malignant: Status post neoadjuvant treatment                | radio  | Yes<br>No                                                                                                                                                                                                                                                                                                                                         |
| Preoperative cholestasis                                                  | radio  | Yes<br>No                                                                                                                                                                                                                                                                                                                                         |
| if yes: Preoperative total bilirubin level (mg/dl)                        | number | (xx.x)                                                                                                                                                                                                                                                                                                                                            |
| if yes: Jaundice                                                          | radio  | Yes<br>No                                                                                                                                                                                                                                                                                                                                         |
| Preoperative biliary drainage                                             | radio  | Yes<br>No                                                                                                                                                                                                                                                                                                                                         |
| if yes: Endoscopic drainage                                               | radio  | Yes<br>No                                                                                                                                                                                                                                                                                                                                         |
| Percutaneous drainage                                                     | radio  | Yes<br>No                                                                                                                                                                                                                                                                                                                                         |
| Operative biliary drainage                                                | radio  | Yes<br>No                                                                                                                                                                                                                                                                                                                                         |
| <b>Charlson Comorbidity Index (revised version)</b>                       |        |                                                                                                                                                                                                                                                                                                                                                   |
| Congestive heart failure                                                  | radio  | Yes (2 Pts.)<br>No                                                                                                                                                                                                                                                                                                                                |
| Dementia                                                                  | radio  | Yes (2 Pts.)<br>No                                                                                                                                                                                                                                                                                                                                |
| Chronic pulmonary disease                                                 | radio  | Yes (1 Pts.)<br>No                                                                                                                                                                                                                                                                                                                                |
| Rheumatologic disease                                                     | radio  | Yes (1 Pts.)<br>No                                                                                                                                                                                                                                                                                                                                |
| Mild liver disease                                                        | radio  | Yes (2 Pts.)<br>No                                                                                                                                                                                                                                                                                                                                |
| Diabetes with chronic complications                                       | radio  | Yes (1 Pts.)<br>No                                                                                                                                                                                                                                                                                                                                |
| Hemiplegia or paraplegia                                                  | radio  | Yes (2 Pts.)<br>No                                                                                                                                                                                                                                                                                                                                |

|                                                                                                                                   |         |                                                                                         |
|-----------------------------------------------------------------------------------------------------------------------------------|---------|-----------------------------------------------------------------------------------------|
| Renal disease                                                                                                                     | radio   | Yes (1 Pt.)<br>No                                                                       |
| Any malignancy, including leukemia and lymphoma                                                                                   | radio   | Yes (2 Pts.)<br>No                                                                      |
| Moderate or severe liver disease                                                                                                  | radio   | Yes (4 Pts.)<br>No                                                                      |
| Metastatic solid tumor                                                                                                            | radio   | Yes (6 Pts.)<br>No                                                                      |
| AIDS/HIV                                                                                                                          | radio   | Yes (4 Pts.)<br>No                                                                      |
| <b>Inclusion criteria</b>                                                                                                         |         |                                                                                         |
| Planned elective partial pancreatoduodenectomy for any indication                                                                 | radio   | Yes<br>No                                                                               |
| Patient equally suitable for both RPD and OPD as judged by the treating pancreatic surgeon                                        | radio   | Yes<br>No                                                                               |
| Age $\geq$ 18 years                                                                                                               | radio   | Yes<br>No                                                                               |
| Ability of subject to understand character and individual consequences of the clinical trial                                      | radio   | Yes<br>No                                                                               |
| Written informed consent                                                                                                          | radio   | Yes<br>No                                                                               |
| if yes: Date of written informed consent                                                                                          | date    |                                                                                         |
| <b>Exclusion criteria</b>                                                                                                         |         |                                                                                         |
| Borderline or non-resectable carcinomas of the pancreatic head as defined by the National Comprehensive Cancer Network guidelines | radio   | Yes<br>No                                                                               |
| Distant metastases                                                                                                                | radio   | Yes<br>No                                                                               |
| American Society of Anaesthesiologists (ASA) Score > 3                                                                            | radio   | Yes<br>No                                                                               |
| Participation in another interventional trial with interference of intervention and outcome of this trial                         | radio   | Yes<br>No                                                                               |
| Expected lack of compliance or language problems                                                                                  | radio   | Yes<br>No                                                                               |
| <b>Patient reported outcome</b>                                                                                                   |         |                                                                                         |
| SF-36 completed                                                                                                                   | radio   | Yes<br>No                                                                               |
| QoR-15 completed                                                                                                                  | radio   | Yes<br>No                                                                               |
| <b>Randomization</b>                                                                                                              |         |                                                                                         |
| Randomization number (must provide value)                                                                                         | integer | (xxx)                                                                                   |
| Treatment group (must provide value)                                                                                              | radio   | Robotic partial pancreatoduodenectomy (RPD)<br>Open partial pancreatoduodenectomy (OPD) |

| <b>Visit 2 Surgery</b>                                                                                                               |             |                                                                                                                        |
|--------------------------------------------------------------------------------------------------------------------------------------|-------------|------------------------------------------------------------------------------------------------------------------------|
| <b>Variable</b>                                                                                                                      | <b>Type</b> | <b>Value</b>                                                                                                           |
| Date of surgery                                                                                                                      | date        |                                                                                                                        |
| <b>Surgeon's expertise</b>                                                                                                           |             |                                                                                                                        |
| Surgeon has performed $\geq$ 40 RPDs                                                                                                 | radio       | Yes<br>No                                                                                                              |
| Surgeon has performed $\geq$ 40 OPD                                                                                                  | radio       | Yes<br>No                                                                                                              |
| <b>Operation details</b>                                                                                                             |             |                                                                                                                        |
| Procedure started as<br>(must provide value)                                                                                         | radio       | RPD<br>OPD                                                                                                             |
| if procedure started as = RPD:<br>start of positioning of the robot<br>(hh:mm)                                                       | time        |                                                                                                                        |
| if procedure started as = OPD:<br>Start of skin incision (hh:mm)                                                                     | time        |                                                                                                                        |
| End of skin closure (hh:mm)                                                                                                          | time        |                                                                                                                        |
| If procedure started= RPD:<br>Intraoperative conversion to open<br>resection                                                         | radio       | Yes<br>No                                                                                                              |
| if yes:<br>Reason                                                                                                                    | radio       | Technical difficulties<br>Underlying disease<br>Other                                                                  |
| if reason = other:<br>Specification of other reason                                                                                  | text        |                                                                                                                        |
| Intraoperative blood loss<br>(according to the anaesthesiology<br>report) (ml)                                                       | integer     | (xxxxx)                                                                                                                |
| Blood transfusion                                                                                                                    | radio       | Yes<br>No                                                                                                              |
| if yes: Number of PRBC                                                                                                               | integer     | (x)                                                                                                                    |
| <b>Type of pancreatic resection</b>                                                                                                  |             |                                                                                                                        |
| Degree of pancreatic resection                                                                                                       | radio       | Partial pancreatoduodenectomy<br>Total pancreatectomy<br>Other<br>No pancreatoduodenectomy performed (end of<br>study) |
| if degree = other:<br>Specification of degree of<br>pancreatic resection                                                             | text        |                                                                                                                        |
| <b>following items will only be asked if degree of pancreatic resection is not answered 'no<br/>pancreatoduodenectomy performed'</b> |             |                                                                                                                        |
| Degree of stomach resection                                                                                                          | radio       | Pylorus-preserving<br>Pylorus resecting<br>Classic (1/3 resection of stomach)<br>(Sub)total gastrectomy<br>Other       |
| Degree of SMA dissection                                                                                                             | radio       | Inoue level 1<br>Inoue level 2<br>Inoue level 3                                                                        |
| Triangle procedure performed                                                                                                         | radio       | Yes<br>No                                                                                                              |

|                                                                                                                                  |       |                                                                                                                                                               |
|----------------------------------------------------------------------------------------------------------------------------------|-------|---------------------------------------------------------------------------------------------------------------------------------------------------------------|
| Interaortocaval or paraaortal lymphadenectomy performed                                                                          | radio | Yes<br>No                                                                                                                                                     |
| Venous resection performed                                                                                                       | radio | Yes<br>No                                                                                                                                                     |
| Arterial resection performed                                                                                                     | radio | Yes<br>No                                                                                                                                                     |
| Resection of additional organs performed beyond PD                                                                               | radio | Yes<br>No                                                                                                                                                     |
| Texture of pancreas                                                                                                              | radio | Soft<br>Medium<br>Hard                                                                                                                                        |
| Size of the pancreatic duct at transection site                                                                                  | radio | ≤ 3mm<br>>3mm                                                                                                                                                 |
| Drain insertion                                                                                                                  | radio | Yes<br>No                                                                                                                                                     |
| Surgical reconstruction performed during index surgery                                                                           | radio | Yes<br>No                                                                                                                                                     |
| if no: Date of reconstruction operation                                                                                          | date  |                                                                                                                                                               |
| if no: Start of reconstruction operation (hh:mm)                                                                                 | time  |                                                                                                                                                               |
| if no: End of reconstruction operation (hh:mm)                                                                                   | time  |                                                                                                                                                               |
| <b>Intraoperative serious complications (for all patients)</b>                                                                   |       |                                                                                                                                                               |
| Intraoperative serious complication                                                                                              | radio | Yes<br>No                                                                                                                                                     |
| if yes: Specification of serious complication                                                                                    | text  |                                                                                                                                                               |
| Seriousness                                                                                                                      | radio | Results in death<br>Is life-threatening<br>Requires prolongation of existing hospitalisation<br>Results in persistent or significant disability or incapacity |
| <b>following items will only be asked if degree of pancreatic resection is not answered 'no pancreatoduodenectomy performed'</b> |       |                                                                                                                                                               |
| <b>NASA Task Load Index</b>                                                                                                      |       |                                                                                                                                                               |
| NASA Task Load Index completed                                                                                                   | radio | Yes<br>No                                                                                                                                                     |
| <b>Protocol violations</b>                                                                                                       |       |                                                                                                                                                               |
| Any protocol violation                                                                                                           | radio | Yes<br>No                                                                                                                                                     |
| if yes: Specification of protocol violation                                                                                      | text  |                                                                                                                                                               |

**if degree of pancreatic resection=no pancreatoduodenectomy performed:  
Signature (only accessible for users with role 'Investigator')**

| Variable                                                                                         | Type           | Value                                    |
|--------------------------------------------------------------------------------------------------|----------------|------------------------------------------|
| I confirm that all data entered in the eCRF is complete and accurate to the best of my knowledge | date           | (date of confirmation should be entered) |
| Investigator's signature                                                                         | signature file |                                          |

| if degree of pancreatic resection is not answered 'no pancreatoduodenectomy performed':<br><b>Visit 2 NASA Task Load Index</b> |         |       |
|--------------------------------------------------------------------------------------------------------------------------------|---------|-------|
| Variable                                                                                                                       | Type    | Value |
| How mentally demanding was the task? (0-20)                                                                                    | integer | (xx)  |
| How physically demanding was the task? (0-20)                                                                                  | integer | (xx)  |
| How hurried or rushed was the pace of the task? (0-20)                                                                         | integer | (xx)  |
| How successful were you in accomplishing what you were asked to do? (0-20)                                                     | integer | (xx)  |
| How hard did you have to work to accomplish your level of performance? (0-20)                                                  | integer | (xx)  |
| How insecure, discouraged, irritated, stressed, and annoyed were you? (0-20)                                                   | integer | (xx)  |

| if degree of pancreatic resection is not answered 'no pancreatoduodenectomy performed': <b>Visit 2 Histopathology</b> |         |                                                                                                                                                                                                                                                                                                              |
|-----------------------------------------------------------------------------------------------------------------------|---------|--------------------------------------------------------------------------------------------------------------------------------------------------------------------------------------------------------------------------------------------------------------------------------------------------------------|
| Variable                                                                                                              | Type    | Value                                                                                                                                                                                                                                                                                                        |
| Histopathological assessment                                                                                          | radio   | Malignant<br>Benign neoplastic lesion<br>Benign non-neoplastic lesion                                                                                                                                                                                                                                        |
| If malignant:<br>Pancreatic cancer subtype according to the current classification of the WHO                         | radio   | Pancreatic ductal adenocarcinoma<br>Intrapancreatic cholangiocarcinoma<br>Ampullary cancer ("Papillenkarzinom")<br>Serous cystadenocarcinoma<br>Mucinous cystadenocarcinoma<br>Intraductal papillary-mucinous carcinoma<br>Acinar cell carcinoma<br>Solid-pseudopapillary neoplasia<br>Neuroendocrine tumour |
| if malignant:<br>Resection status                                                                                     | radio   | Microscopically complete margin clearance >0.1 cm margin clearance, R0 CRM-<br>Microscopic margin clearance ≤0.1cm, R0 CRM+<br>Microscopic margin involvement, R1                                                                                                                                            |
| if malignant:<br>Number of resected lymph nodes                                                                       | integer | (xx)                                                                                                                                                                                                                                                                                                         |
| if malignant:<br>Number of tumour positive lymph nodes                                                                | integer | (xx)                                                                                                                                                                                                                                                                                                         |
| if malignant:<br>Distant metastases                                                                                   | radio   | M0<br>M1<br>Mx (cM, uM or pM)                                                                                                                                                                                                                                                                                |
| If benign neoplastic lesion:<br>Benign neoplastic lesion                                                              | radio   | Intraductal papillary mucinous neoplasm (IPMN)<br>Serous cystic neoplasm (SCN)<br>Mucinous cystic neoplasm (MCN)<br>Other                                                                                                                                                                                    |

|                                                          |       |                                                                         |
|----------------------------------------------------------|-------|-------------------------------------------------------------------------|
| if other: Specification of other neoplastic lesion       | text  |                                                                         |
| If benign non-neoplastic lesion: Specification of lesion | radio | Pseudocysts<br>Chronic pancreatitis<br>Autoimmune pancreatitis<br>Other |
| if other: Specification of other non-neoplastic lesion   | text  |                                                                         |

if degree of pancreatic resection is not answered 'no pancreatoduodenectomy performed':

**Visit 3 POD 4, Visit 4 POD 8, Visit 5 POD 12, Visit 6 day of discharge**

| Variable                                                                                                                 | Type    | Value                                             |
|--------------------------------------------------------------------------------------------------------------------------|---------|---------------------------------------------------|
| if visit= visit 3 or visit 4 or visit 5:<br>Date of visit                                                                | date    |                                                   |
| if visit= visit 6:<br>Date of discharge                                                                                  | date    |                                                   |
| <b>Functional recovery</b>                                                                                               |         |                                                   |
| Please check items for functional recovery on global form 'Functional recovery', please complete it latest on last visit |         |                                                   |
| <b>if visit=visit 6: Intensive care unit (ICU) stay</b>                                                                  |         |                                                   |
| if visit=visit 6: ICU stay from index surgery until discharge                                                            | radio   | Yes<br>No                                         |
| if yes: number of days on ICU                                                                                            | integer | (xxx)                                             |
| <b>if visit= visit 3: Pain assessment</b>                                                                                |         |                                                   |
| <b>Pain assessment on POD2</b>                                                                                           |         |                                                   |
| if visit= visit 3: Pain at rest (NRS 0-10)                                                                               | integer | (xx)                                              |
| if visit= visit 3: Pain during movement (NRS 0-10)                                                                       | integer | (xx)                                              |
| <b>Pain assessment on POD4</b>                                                                                           |         |                                                   |
| if visit= visit 3: Pain at rest (NRS 0-10)                                                                               | integer | (xx)                                              |
| if visit= visit 3: Pain during movement (NRS 0-10)                                                                       | integer | (xx)                                              |
| <b>Pancreas-specific complications since last visit</b>                                                                  |         |                                                   |
| Postoperative pancreatic fistula as defined by the ISGPS                                                                 | radio   | No POPF<br>Biochemical Leak<br>Grade B<br>Grade C |
| Postpancreatectomy haemorrhage as defined by the ISGPS                                                                   | radio   | No haemorrhage<br>Grade A<br>Grade B<br>Grade C   |
| Delayed gastric emptying as defined by the ISGPS                                                                         | radio   | no DGE<br>Grade A<br>Grade B<br>Grade C           |

|                                                                                                                                   |             |                                                                                                                                          |
|-----------------------------------------------------------------------------------------------------------------------------------|-------------|------------------------------------------------------------------------------------------------------------------------------------------|
| Biliary leak as defined by the ISGLS                                                                                              | radio       | No leak<br>Grade A<br>Grade B<br>Grade C                                                                                                 |
| Chyle leak / lymphatic fistula as defined by the ISGPS                                                                            | radio       | No chyle leak / no lymphatic fistula<br>Grade A<br>Grade B<br>Grade C                                                                    |
| <b>Other complications since last visit</b>                                                                                       |             |                                                                                                                                          |
| Surgical site infection according to CDC                                                                                          | radio       | No SSI<br>Superficial SSI<br>Deep SSI                                                                                                    |
| Other complications                                                                                                               | radio       | Yes<br>No                                                                                                                                |
| in case of any complication (one of defined complication at least Grade A / biochemical leak or SSI or other complication = yes): | descriptive | Please enter complication(s) in eForm 'Complications'                                                                                    |
| <b>Non-surgical interventions since last visit</b>                                                                                |             |                                                                                                                                          |
| Any non-surgical intervention(s) since last visit (CT guided drain placement / Angiography with stenting / Endoscopy / Other)     | radio       | Yes<br>No                                                                                                                                |
| if yes:                                                                                                                           | descriptive | Please enter every non-surgical intervention in eForm 'Non-surgical intervention' and reason(s) for intervention in eForm 'Complication' |
| <b>Re-operation since last visit</b>                                                                                              |             |                                                                                                                                          |
| Re-operation since last visit                                                                                                     | radio       | Yes<br>No                                                                                                                                |
| if yes:                                                                                                                           | descriptive | Please enter re-operation(s) in eForm 'Reoperation' and reason(s) for re-operation in eForm 'Complication'                               |
| <b>If visit=visit 3: Patient reported outcome</b>                                                                                 |             |                                                                                                                                          |
| QoR-15 completed                                                                                                                  | radio       | Yes<br>No                                                                                                                                |
| <b>Any protocol violation since last visit</b>                                                                                    |             |                                                                                                                                          |
| Any protocol violation                                                                                                            | radio       | Yes<br>No                                                                                                                                |
| if yes: Specification of protocol violation                                                                                       | text        |                                                                                                                                          |

if degree of pancreatic resection is not answered 'no pancreatoduodenectomy performed':

**Visit 7 POD 30, Visit 8 POD90/EoS**

| Variable                                                                  | Type     | Value    |
|---------------------------------------------------------------------------|----------|----------|
| if visit= visit 7:<br>Please tick this box if visit was not performed     | Checkbox | Not done |
| If 'not done' is ticked no further entry is possible for respective visit |          |          |



| <b>Study termination</b>                                                                                                 |         |                                                                                     |
|--------------------------------------------------------------------------------------------------------------------------|---------|-------------------------------------------------------------------------------------|
| if visit= visit 8:<br>Was the trial terminated regularly<br>for this patient                                             | radio   | Yes<br>No                                                                           |
| if no: Date of premature trial<br>termination /last contact                                                              | date    |                                                                                     |
| if no: Reason for premature trial<br>termination                                                                         | radio   | Patient died<br>Withdrawal of informed consent<br>Lost to follow-up<br>Other reason |
| if other reason: Specification of<br>other reason for premature<br>termination                                           | text    |                                                                                     |
| if death: Date of death                                                                                                  | date    |                                                                                     |
| if death: Cause of death                                                                                                 | radio   | Related to index surgery<br>Other<br>Unknown                                        |
| if other: Specification of other<br>cause of death                                                                       | text    |                                                                                     |
| if terminated regularly = yes or<br>visit = v7:<br>Date of visit                                                         | date    |                                                                                     |
| <b>Functional recovery</b>                                                                                               |         |                                                                                     |
| Please check items for functional recovery on global form 'Functional recovery', please complete it latest on last visit |         |                                                                                     |
| <b>if visit=visit 8 and discharge date = missing (patient not discharged): Intensive care unit (ICU) stay</b>            |         |                                                                                     |
| if visit=visit 8 and discharge date =<br>missing: ICU stay from index<br>surgery until discharge                         | radio   | Yes<br>No                                                                           |
| if yes: Number of days on ICU                                                                                            | integer | (xxx)                                                                               |
| <b>Pancreas-specific complications since last visit</b>                                                                  |         |                                                                                     |
| Postoperative pancreatic fistula as<br>defined by the ISGPS                                                              | radio   | No POPF<br>Biochemical Leak<br>Grade B<br>Grade C                                   |
| Postpancreatectomy haemorrhage<br>as defined by the ISGPS                                                                | radio   | No haemorrhage<br>Grade A<br>Grade B<br>Grade C                                     |
| Delayed gastric emptying as<br>defined by the ISGPS                                                                      | radio   | no DGE<br>Grade A<br>Grade B<br>Grade C                                             |
| Biliary leak as defined by the ISGLS                                                                                     | radio   | No leak<br>Grade A<br>Grade B<br>Grade C                                            |
| Chyle leak / lymphatic fistula as<br>defined by the ISGPS                                                                | radio   | No chyle leak / no lymphatic fistula<br>Grade A<br>Grade B<br>Grade C               |
| <b>Other complications since last visit</b>                                                                              |         |                                                                                     |

|                                                                                                                                   |             |                                                                                                                                          |
|-----------------------------------------------------------------------------------------------------------------------------------|-------------|------------------------------------------------------------------------------------------------------------------------------------------|
| if visit=visit 7:<br>Surgical site infection according to CDC                                                                     | radio       | No SSI<br>Superficial SSI<br>Deep SSI                                                                                                    |
| Other complications                                                                                                               | radio       | Yes<br>No                                                                                                                                |
| in case of any complication (one of defined complication at least Grade A / biochemical leak or SSI or other complication = yes): | descriptive | Please enter complication(s) in eForm 'Complications'                                                                                    |
| <b>Non-surgical interventions since last visit</b>                                                                                |             |                                                                                                                                          |
| Any non-surgical intervention(s) since last visit<br>(CT guided drain placement / Angiography with stenting / Endoscopy / Other)  | radio       | Yes<br>No                                                                                                                                |
| if yes:                                                                                                                           | descriptive | Please enter every non-surgical intervention in eForm 'Non-surgical intervention' and reason(s) for intervention in eForm 'Complication' |
| <b>Re-operation since last visit</b>                                                                                              |             |                                                                                                                                          |
| Re-operation since last visit                                                                                                     | radio       | Yes<br>No                                                                                                                                |
| if yes:                                                                                                                           | descriptive | Please enter re-operation(s) in eForm 'Reoperation' and reason(s) for re-operation in eForm 'Complication'                               |
| if visit 6 discharge date not missing: <b>Readmission to hospital since last visit</b>                                            |             |                                                                                                                                          |
| Readmission to hospital since last visit                                                                                          | radio       | Yes<br>No                                                                                                                                |
| if yes:                                                                                                                           | descriptive | Please enter readmission(s) in eForm 'Readmission' and reason(s) for readmission in eForm 'Complication'                                 |
| <b>if visit=8: Costs</b>                                                                                                          |             |                                                                                                                                          |
| Procedure related costs (Euro)                                                                                                    | integer     | (xxxxxx)                                                                                                                                 |
| Overall inpatient costs (Euro)                                                                                                    | integer     | (xxxxxx)                                                                                                                                 |
| <b>if visit=7 or visit=8 and trial terminated regularly=yes: Patient reported outcome</b>                                         |             |                                                                                                                                          |
| SF-36 completed                                                                                                                   | radio       | Yes<br>No                                                                                                                                |
| <b>Any protocol violation since last visit</b>                                                                                    |             |                                                                                                                                          |
| Any protocol violation                                                                                                            | radio       | Yes<br>No                                                                                                                                |
| if yes: Specification of protocol violation                                                                                       | text        |                                                                                                                                          |

if degree of pancreatic resection is not answered 'no pancreatoduodenectomy performed':

**Signature (only accessible for users with role 'Investigator')**

| Variable                                                                                         | Type           | Value                                    |
|--------------------------------------------------------------------------------------------------|----------------|------------------------------------------|
| I confirm that all data entered in the eCRF is complete and accurate to the best of my knowledge | date           | (date of confirmation should be entered) |
| Investigator's signature                                                                         | signature file |                                          |

## Global Pages

if degree of pancreatic resection is not answered 'no pancreatoduodenectomy performed':

### Functional recovery

| Variable                                                                          | Type  | Value     |
|-----------------------------------------------------------------------------------|-------|-----------|
| <b>Functional recovery</b>                                                        |       |           |
| Independently mobile at the preoperative level                                    | radio | Yes<br>No |
| if yes: Date since when                                                           | date  |           |
| Sufficient pain control with oral pain medication                                 | radio | Yes<br>No |
| if yes: Date since when                                                           | date  |           |
| Ability to maintain sufficient (i.e. >50%) daily required caloric intake by mouth | radio | Yes<br>No |
| if yes: Date since when                                                           | date  |           |
| No intravenous fluid administration                                               | radio | Yes<br>No |
| if yes: Date since when                                                           | date  |           |
| No signs of infection                                                             | radio | Yes<br>No |
| if yes: Date since when                                                           | date  |           |

if degree of pancreatic resection is not answered 'no pancreatoduodenectomy performed':

### Complications (repeatable instrument)

| Variable                                                                  | Type  | Value                                                                                |
|---------------------------------------------------------------------------|-------|--------------------------------------------------------------------------------------|
| Complication                                                              | text  |                                                                                      |
| Grading according to Clavien-Dindo                                        | radio | Grade I<br>Grade II<br>Grade IIIa<br>Grade IIIb<br>Grade IVa<br>Grade IVb<br>Grade V |
| Date of onset                                                             | date  |                                                                                      |
| if grade not answered 'Grade V':<br>Ongoing at time of hospital discharge | radio | Yes<br>No                                                                            |

if degree of pancreatic resection is not answered 'no pancreatoduodenectomy performed':

### Non-surgical intervention (repeatable instrument)

| Variable                                                                                   | Type  | Value                                                                                          |
|--------------------------------------------------------------------------------------------|-------|------------------------------------------------------------------------------------------------|
| Type of non-surgical intervention                                                          | radio | CT guided drain placement<br>Angiography (with/without stenting/coiling)<br>Endoscopy<br>Other |
| Specification of other intervention                                                        | text  |                                                                                                |
| Please enter reason for non-surgical intervention as complication in eForm 'Complications' |       |                                                                                                |

if degree of pancreatic resection is not answered 'no pancreatoduodenectomy performed':

### Re-operation (repeatable instrument)

| Variable                                                                      | Type | Value |
|-------------------------------------------------------------------------------|------|-------|
| Specification of re-operation                                                 | text |       |
| Date of re-operation                                                          | date |       |
| Please enter reason for re-operation as complication in eForm 'Complications' |      |       |

if degree of pancreatic resection is not answered 'no pancreatoduodenectomy performed':

### Readmission to hospital (repeatable instrument)

| Variable                                      | Type        | Value                                                                                                                              |
|-----------------------------------------------|-------------|------------------------------------------------------------------------------------------------------------------------------------|
| Date of admission to hospital                 | date        |                                                                                                                                    |
| Reason for readmission                        | radio       | Related to index operation<br>Related to underlying index disease<br>Unrelated to index operation or underlying index disease      |
| Intervention                                  | checkbox    | Re-operation<br>Non-surgical intervention<br>Medication change<br>Other                                                            |
| if other: Specification of other intervention | text        |                                                                                                                                    |
| if re-operation:                              | descriptive | Please enter re-operation(s) in eForm 'Reoperation' and reason(s) for re-operation in eForm 'Complication'                         |
| if non-surgical intervention:                 | descriptive | Please enter non-surgical intervention in eForm 'Non-surgical intervention' and reason(s) for intervention in eForm 'Complication' |
| Ongoing hospital stay at end of study         | radio       | yes<br>no                                                                                                                          |
| if no: End of re-hospitalisation              | date        |                                                                                                                                    |

|                               |         |           |
|-------------------------------|---------|-----------|
| Stay on ICU                   | radio   | yes<br>no |
| if yes: Number of days on ICU | integer | (xx)      |

## Patient Reported Outcome

| <b>QoR-15 (Quality of Recovery) (visit 1, visit 3 only if degree of pancreatic resection is not answered 'no pancreatoduodenectomy performed')</b> |              |                                                                      |
|----------------------------------------------------------------------------------------------------------------------------------------------------|--------------|----------------------------------------------------------------------|
| Variable                                                                                                                                           | Type         | Value                                                                |
| Datum des Ausfüllens<br><i>If exact date not known, please skip this field and enter year and month (if known) below</i>                           | date         |                                                                      |
| Falls Datum unvollständig angegeben, bitte Monat eintragen                                                                                         | dropdown     | 01<br>02<br>03<br>04<br>...<br>11<br>12                              |
| Falls Datum unvollständig angegeben, bitte Jahr eintragen                                                                                          | integer      |                                                                      |
| <b>Teil A</b>                                                                                                                                      | descriptive  | Wie haben Sie sich in den letzten 24 Stunden gefühlt?                |
| 1. Ich konnte problemlos durchatmen.                                                                                                               | Radio matrix | 0, zu keinem Zeitpunkt<br>1-9<br>10, Immer                           |
| 2. Ich konnte das Essen genießen.                                                                                                                  | Radio matrix | 0, zu keinem Zeitpunkt<br>1-9<br>10, Immer                           |
| 3. Ich habe mich ausgeruht gefühlt.                                                                                                                | Radio matrix | 0, zu keinem Zeitpunkt<br>1-9<br>10, Immer                           |
| 4. Ich konnte gut schlafen.                                                                                                                        | Radio matrix | 0, zu keinem Zeitpunkt<br>1-9<br>10, Immer                           |
| 5. Ich war in der Lage, mich selbst (ohne Hilfe) um meine persönliche Hygiene zu kümmern.                                                          | Radio matrix | 0, zu keinem Zeitpunkt<br>1-9<br>10, Immer                           |
| 6. Ich konnte mich mit meiner Familie und mit Freunden unterhalten.                                                                                | Radio matrix | 0, zu keinem Zeitpunkt<br>1-9<br>10, Immer                           |
| 7. Unterstützung durch Klinikärzte und der Pflege                                                                                                  | Radio matrix | 0, zu keinem Zeitpunkt<br>1-9<br>10, Immer                           |
| 8. Ich wäre in der Lage, zur Arbeit oder den normalen häuslichen Aktivitäten zurückzukehren.                                                       | Radio matrix | 0, zu keinem Zeitpunkt<br>1-9<br>10, Immer                           |
| 9. Ich habe mich angenehm gefühlt und hatte das Gefühl, Einfluss auf den Lauf der Dinge zu haben.                                                  | Radio matrix | 0, zu keinem Zeitpunkt<br>1-9<br>10, Immer                           |
| 10. Ich habe ein Gefühl des Wohlbefindens.                                                                                                         | Radio matrix | 0, zu keinem Zeitpunkt<br>1-9<br>10, Immer                           |
| <b>Teil B</b>                                                                                                                                      | descriptive  | Hatten Sie während der letzten 24 Stunden die folgenden Beschwerden? |

|                                                             |              |                                            |
|-------------------------------------------------------------|--------------|--------------------------------------------|
| 11. Moderate Schmerzen                                      | Radio matrix | 10, zu keinem Zeitpunkt<br>9-1<br>0, Immer |
| 12. Starke Schmerzen                                        | Radio matrix | 10, zu keinem Zeitpunkt<br>9-1<br>0, Immer |
| 13. Übelkeit und Erbrechen                                  | Radio matrix | 10, zu keinem Zeitpunkt<br>9-1<br>0, Immer |
| 14. Ich habe mir Sorgen gemacht und mich ängstlich gefühlt. | Radio matrix | 10, zu keinem Zeitpunkt<br>9-1<br>0, Immer |
| 15. Ich habe mich traurig und niedergeschlagen gefühlt.     | Radio matrix | 10, zu keinem Zeitpunkt<br>9-1<br>0, Immer |

**SF-36 (visit 1, visit 7, 8 only if degree of pancreatic resection is not answered 'no pancreatoduodenectomy performed')**

| Variable                                                                                                                 | Type     | Value                                                                                                                         |
|--------------------------------------------------------------------------------------------------------------------------|----------|-------------------------------------------------------------------------------------------------------------------------------|
| Datum des Ausfüllens<br><i>If exact date not known, please skip this field and enter year and month (if known) below</i> | date     |                                                                                                                               |
| Falls Datum unvollständig angegeben, bitte Monat eintragen                                                               | dropdown | 01<br>02<br>03<br>04<br>...<br>11<br>12                                                                                       |
| Falls Datum unvollständig angegeben, bitte Jahr eintragen                                                                | integer  |                                                                                                                               |
| 1. Wie würden Sie Ihren Gesundheitszustand im Allgemeinen beschreiben?                                                   | radio    | Ausgezeichnet<br>Sehr gut<br>Gut<br>Weniger gut<br>Schlecht                                                                   |
| 2. Im Vergleich zum vergangenen Jahr, wie würden Sie Ihren derzeitigen Gesundheitszustand beschreiben?                   | radio    | Derzeit viel besser<br>Derzeit etwas besser<br>Etwa wie vor einem Jahr<br>Derzeit etwas schlechter<br>Derzeit viel schlechter |
| 3.a. anstrengende Tätigkeiten                                                                                            | radio    | Ja, stark eingeschränkt<br>Ja, etwas eingeschränkt<br>Nein, überhaupt nicht eingeschränkt                                     |
| 3.b. mittelschwere Tätigkeiten                                                                                           | radio    | Ja, stark eingeschränkt<br>Ja, etwas eingeschränkt<br>Nein, überhaupt nicht eingeschränkt                                     |
| 3.c. Einkaufstaschen heben oder tragen                                                                                   | radio    | Ja, stark eingeschränkt<br>Ja, etwas eingeschränkt<br>Nein, überhaupt nicht eingeschränkt                                     |



|                                                                                                                                                                                                              |       |                                                                                           |
|--------------------------------------------------------------------------------------------------------------------------------------------------------------------------------------------------------------|-------|-------------------------------------------------------------------------------------------|
| 3.d. mehrere Treppenabsätze steigen                                                                                                                                                                          | radio | Ja, stark eingeschränkt<br>Ja, etwas eingeschränkt<br>Nein, überhaupt nicht eingeschränkt |
| 3.e. einen Treppenabsatz steigen                                                                                                                                                                             | radio | Ja, stark eingeschränkt<br>Ja, etwas eingeschränkt<br>Nein, überhaupt nicht eingeschränkt |
| 3.f. sich beugen, knien, bücken                                                                                                                                                                              | radio | Ja, stark eingeschränkt<br>Ja, etwas eingeschränkt<br>Nein, überhaupt nicht eingeschränkt |
| 3.g. mehr als einen Kilometer zu Fuß gehen                                                                                                                                                                   | radio | Ja, stark eingeschränkt<br>Ja, etwas eingeschränkt<br>Nein, überhaupt nicht eingeschränkt |
| 3.h. mehrere Straßenkreuzungen weit zu Fuß gehen                                                                                                                                                             | radio | Ja, stark eingeschränkt<br>Ja, etwas eingeschränkt<br>Nein, überhaupt nicht eingeschränkt |
| 3.i. eine Straßenkreuzung weit zu Fuß gehen                                                                                                                                                                  | radio | Ja, stark eingeschränkt<br>Ja, etwas eingeschränkt<br>Nein, überhaupt nicht eingeschränkt |
| 3.j. sich baden oder anziehen                                                                                                                                                                                | radio | Ja, stark eingeschränkt<br>Ja, etwas eingeschränkt<br>Nein, überhaupt nicht eingeschränkt |
| 4.a Ich konnte nicht so lange wie üblich tätig sein                                                                                                                                                          | radio | Ja<br>Nein                                                                                |
| 4.b Ich habe weniger geschafft als ich wollt                                                                                                                                                                 | radio | Ja<br>Nein                                                                                |
| 4.c Ich konnte nur bestimmte Dinge tun                                                                                                                                                                       | radio | Ja<br>Nein                                                                                |
| 4.d Ich hatte Schwierigkeiten bei der Ausführung                                                                                                                                                             | radio | Ja<br>Nein                                                                                |
| 5.a Ich konnte nicht so lange wie üblich tätig sein                                                                                                                                                          | radio | Ja<br>Nein                                                                                |
| 5.b Ich habe weniger geschafft als ich wollte                                                                                                                                                                | radio | Ja<br>Nein                                                                                |
| 5.c Ich konnte nicht so sorgfältig wie üblich arbeiten                                                                                                                                                       | radio | Ja<br>Nein                                                                                |
| 6. Wie sehr haben Ihre körperliche Gesundheit oder seelischen Probleme in den vergangenen 4 Wochen Ihre normalen Kontakte zu Familienangehörigen, Freunden, Nachbarn oder zum Bekanntenkreis beeinträchtigt? | radio | Überhaupt nicht<br>Etwas<br>Mäßig<br>Ziemlich<br>Sehr                                     |
| 7. Wie stark waren Ihre Schmerzen in den vergangenen 4 Wochen?                                                                                                                                               | radio | Keine Schmerzen<br>Sehr leicht<br>Leicht<br>Mäßig<br>Stark<br>Sehr stark                  |

|                                                                                                                                             |       |                                                                |
|---------------------------------------------------------------------------------------------------------------------------------------------|-------|----------------------------------------------------------------|
| 8. Inwieweit haben die Schmerzen Sie in den vergangenen 4 Wochen bei der Ausübung Ihrer Alltagstätigkeiten zu Hause und im Beruf behindert? | radio | Überhaupt nicht<br>Etwas<br>Mäßig<br>Ziemlich<br>Sehr          |
| 9.a ... voller Schwung                                                                                                                      | radio | Immer<br>Meistens<br>Ziemlich oft<br>Manchmal<br>Selten<br>Nie |
| 9.b ... sehr nervös?                                                                                                                        | radio | Immer<br>Meistens<br>Ziemlich oft<br>Manchmal<br>Selten<br>Nie |
| 9.c ... so niedergeschlagen, dass Sie nichts aufheitern konnte?                                                                             | radio | Immer<br>Meistens<br>Ziemlich oft<br>Manchmal<br>Selten<br>Nie |
| 9.d ... ruhig und gelassen?                                                                                                                 | radio | Immer<br>Meistens<br>Ziemlich oft<br>Manchmal<br>Selten<br>Nie |
| 9.e ... voller Energie?                                                                                                                     | radio | Immer<br>Meistens<br>Ziemlich oft<br>Manchmal<br>Selten<br>Nie |
| 9.f ... entmutigt und traurig?                                                                                                              | radio | Immer<br>Meistens<br>Ziemlich oft<br>Manchmal<br>Selten<br>Nie |
| 9.g ... erschöpft?                                                                                                                          | radio | Immer<br>Meistens<br>Ziemlich oft<br>Manchmal<br>Selten<br>Nie |
| 9.h ... glücklich?                                                                                                                          | radio | Immer<br>Meistens<br>Ziemlich oft<br>Manchmal<br>Selten<br>Nie |

|                                                                                                                                                         |       |                                                                                                                 |
|---------------------------------------------------------------------------------------------------------------------------------------------------------|-------|-----------------------------------------------------------------------------------------------------------------|
| 9.i ... müde?                                                                                                                                           | radio | Immer<br>Meistens<br>Ziemlich oft<br>Manchmal<br>Selten<br>Nie                                                  |
| 10. Wie häufig haben Ihre körperliche Gesundheit oder seelischen Probleme in den vergangenen 4 Wochen Ihre Kontakte zu anderen Menschen beeinträchtigt? | radio | Immer<br>Meistens<br>Manchmal<br>Selten<br>Nie                                                                  |
| 11.a Ich scheine etwas leichter als andere krank zu werden.                                                                                             | radio | Trifft ganz zu<br>Trifft weitgehend zu<br>Weiß nicht<br>Trifft weitgehend nicht zu<br>Trifft überhaupt nicht zu |
| 11.b Ich bin genauso gesund wie alle anderen, die ich kenne.                                                                                            | radio | Trifft ganz zu<br>Trifft weitgehend zu<br>Weiß nicht<br>Trifft weitgehend nicht zu<br>Trifft überhaupt nicht zu |
| 11.c Ich erwarte, dass meine Gesundheit nachlässt.                                                                                                      | radio | Trifft ganz zu<br>Trifft weitgehend zu<br>Weiß nicht<br>Trifft weitgehend nicht zu<br>Trifft überhaupt nicht zu |
| 11.d Ich erfreue mich ausgezeichneter Gesundheit.                                                                                                       | radio | Trifft ganz zu<br>Trifft weitgehend zu<br>Weiß nicht<br>Trifft weitgehend nicht zu<br>Trifft überhaupt nicht zu |
